# Supplementary material for: Toward Long-Term Monitoring of Regional Permafrost Thaw with Satellite InSAR
Source: Copernicus journal article supplement (doi:10.5194/egusphere-2023-2605), 2023-12-21
Supplement: Supplementary file 1 [file egusphere-2023-2605-supplement.pdf]

## Introduction

Supplement material includes information of used interferograms in this study (Table-S1), ICESat-2 height difference data in 2021 thaw season (Figure-S1), and the coherence maps for two compared sites, Beta (located in discontinuous permafrost zone) and U8 (located in continuous permafrost zone) (Figure-S2).

| <b>Interferogram [Date1_Date2]</b> | <b>Perpendicular Baseline [m]</b> |
|------------------------------------|-----------------------------------|
| 20170612_20170624                  | 68                                |
| 20170612_20170706                  | 3.3                               |
| 20170612_20170718                  | -93.4                             |
| 20170612_20170730                  | -40.3                             |
| 20170612_20170811                  | -20.2                             |
| 20170624_20170730                  | -108.3                            |
| 20170624_20170811                  | -88.2                             |
| 20170624_20170823                  | -98.2                             |
| 20170706_20170718                  | -96.7                             |
| 20170706_20170730                  | -43.6                             |
| 20170706_20170811                  | -23.5                             |
| 20170706_20170823                  | -33.5                             |
| 20170706_20170904                  | 25.1                              |
| 20170718_20170730                  | 53.1                              |
| 20170718_20170823                  | 63.2                              |
| 20170718_20170904                  | 121.8                             |
| 20170811_20170823                  | -10                               |
| 20170811_20170904                  | 48.6                              |
| 20180607_20180701                  | 96.4                              |
| 20180607_20180713                  | 151.8                             |
| 20180619_20180701                  | 83.8                              |
| 20180619_20180713                  | 139.2                             |
| 20180619_20180725                  | 83.5                              |
| 20180619_20180806                  | 50.9                              |
| 20180619_20180818                  | -17.7                             |
| 20180713_20180818                  | -156.9                            |
| 20180713_20180830                  | -38.4                             |
| 20180713_20180911                  | -50.1                             |
| 20180725_20180818                  | -101.2                            |
| 20180725_20180830                  | 17.4                              |
| 20180725_20180911                  | 5.7                               |
| 20180806_20180818                  | -68.6                             |
| 20180806_20180830                  | 50                                |
| 20180806_20180911                  | 38.3                              |
| 20180818_20180830                  | 118.6                             |

|                   |        |
|-------------------|--------|
| 20180818_20180911 | 106.9  |
| 20180830_20180911 | -11.7  |
| 20190602_20190614 | -77.5  |
| 20190602_20190626 | -129.9 |
| 20190602_20190720 | -70.4  |
| 20190602_20190801 | -13.4  |
| 20190602_20190813 | -54.3  |
| 20190614_20190708 | -70.3  |
| 20190614_20190720 | 7.1    |
| 20190614_20190801 | 64.2   |
| 20190614_20190813 | 23.2   |
| 20190626_20190708 | -18    |
| 20190626_20190720 | 59.5   |
| 20190626_20190813 | 75.6   |
| 20190626_20190825 | 8.2    |
| 20190708_20190720 | 77.4   |
| 20190708_20190801 | 134.5  |
| 20190708_20190813 | 93.5   |
| 20190708_20190825 | 26.2   |
| 20190708_20190906 | -1     |
| 20190720_20190813 | 16.1   |
| 20190801_20190813 | -40.9  |
| 20200608_20200620 | 56.3   |
| 20200608_20200714 | -88.7  |
| 20200608_20200726 | -26.7  |
| 20200608_20200807 | -31.3  |
| 20200608_20200831 | -16.1  |
| 20200620_20200714 | -145   |
| 20200620_20200726 | -82.9  |
| 20200620_20200807 | -87.5  |
| 20200620_20200819 | -108.7 |
| 20200620_20200831 | -72.4  |
| 20200714_20200819 | 36.3   |
| 20200714_20200831 | 72.6   |
| 20200726_20200807 | -4.6   |
| 20200726_20200819 | -25.8  |
| 20200726_20200831 | 10.5   |
| 20200807_20200819 | -21.2  |
| 20200807_20200831 | 15.1   |
| 20200819_20200831 | 36.3   |
| 20210603_20210709 | 163.6  |
| 20210603_20210721 | 90.4   |

|                   |       |
|-------------------|-------|
| 20210603_20210802 | 80.2  |
| 20210603_20210814 | 85.5  |
| 20210603_20210907 | 94    |
| 20210615_20210721 | 23.2  |
| 20210615_20210802 | 13    |
| 20210615_20210814 | 18.2  |
| 20210615_20210826 | 22.5  |
| 20210627_20210721 | -24.2 |
| 20210627_20210802 | -34.4 |
| 20210627_20210814 | -29.2 |
| 20210627_20210826 | -24.9 |
| 20210709_20210814 | -78.2 |
| 20210709_20210826 | -73.9 |
| 20210709_20210907 | -69.6 |
| 20210721_20210802 | -10.2 |
| 20210721_20210826 | -0.7  |
| 20210721_20210907 | 3.6   |
| 20210802_20210814 | 5.2   |
| 20210802_20210826 | 9.5   |
| 20210802_20210907 | 13.8  |
| 20210814_20210907 | 8.6   |
| 20220610_20220704 | -29.6 |
| 20220610_20220716 | -8.5  |
| 20220610_20220728 | 53.2  |
| 20220610_20220809 | -25.5 |
| 20220610_20220821 | 1.5   |
| 20220622_20220716 | 26.8  |
| 20220622_20220728 | 88.5  |
| 20220622_20220809 | 9.8   |
| 20220622_20220821 | 36.8  |
| 20220704_20220809 | 4     |
| 20220704_20220821 | 31.1  |
| 20220716_20220728 | 61.7  |
| 20220716_20220809 | -17   |
| 20220716_20220821 | 10    |
| 20220716_20220902 | -26.1 |
| 20220728_20220809 | -78.7 |
| 20220728_20220821 | -51.7 |
| 20220809_20220821 | 27    |

**Table-S1.** Information of interferograms used in this study.

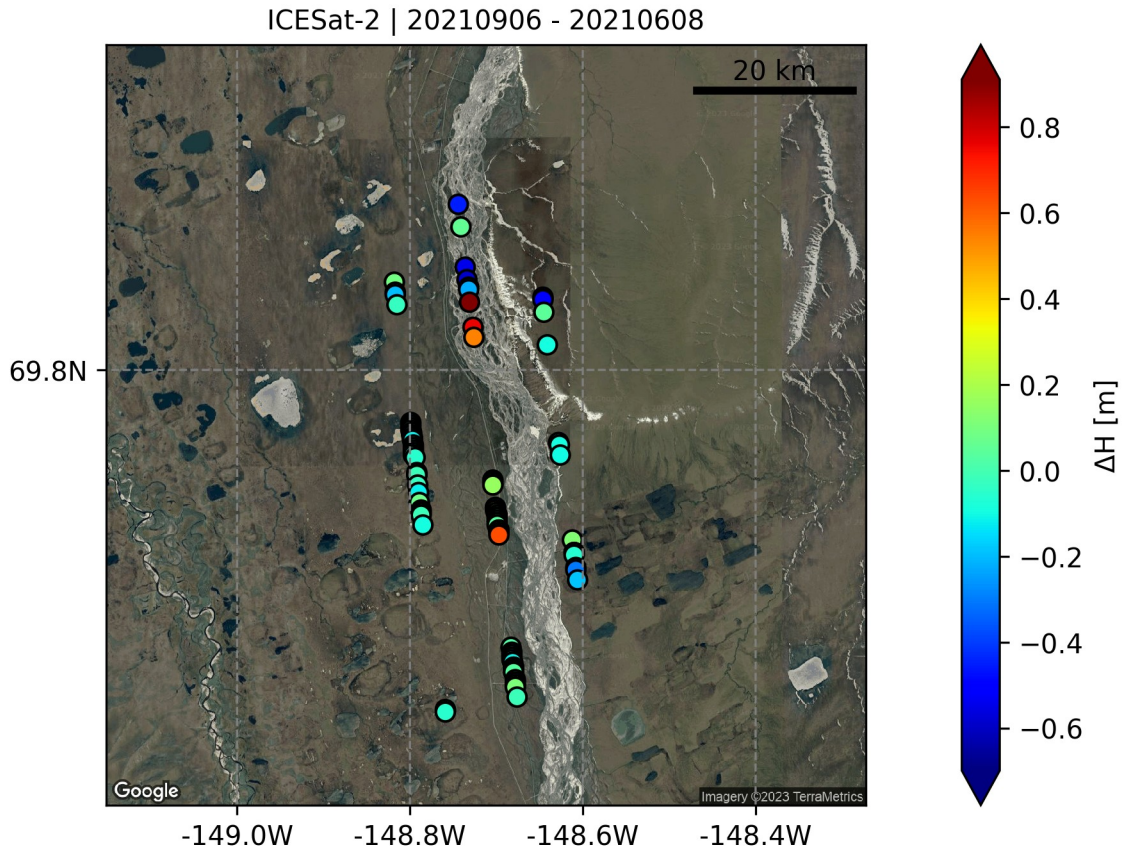

**Figure-S1.** ICESat-2 ATL-08 best-fitted terrain height ('h\_te\_best\_fit') difference between two epochs: 2021-06-08 and 2021-09-06 for study area. Each circle represents height different between two epochs for 50 m grid cell. Read ICESat-2 data processing for details.

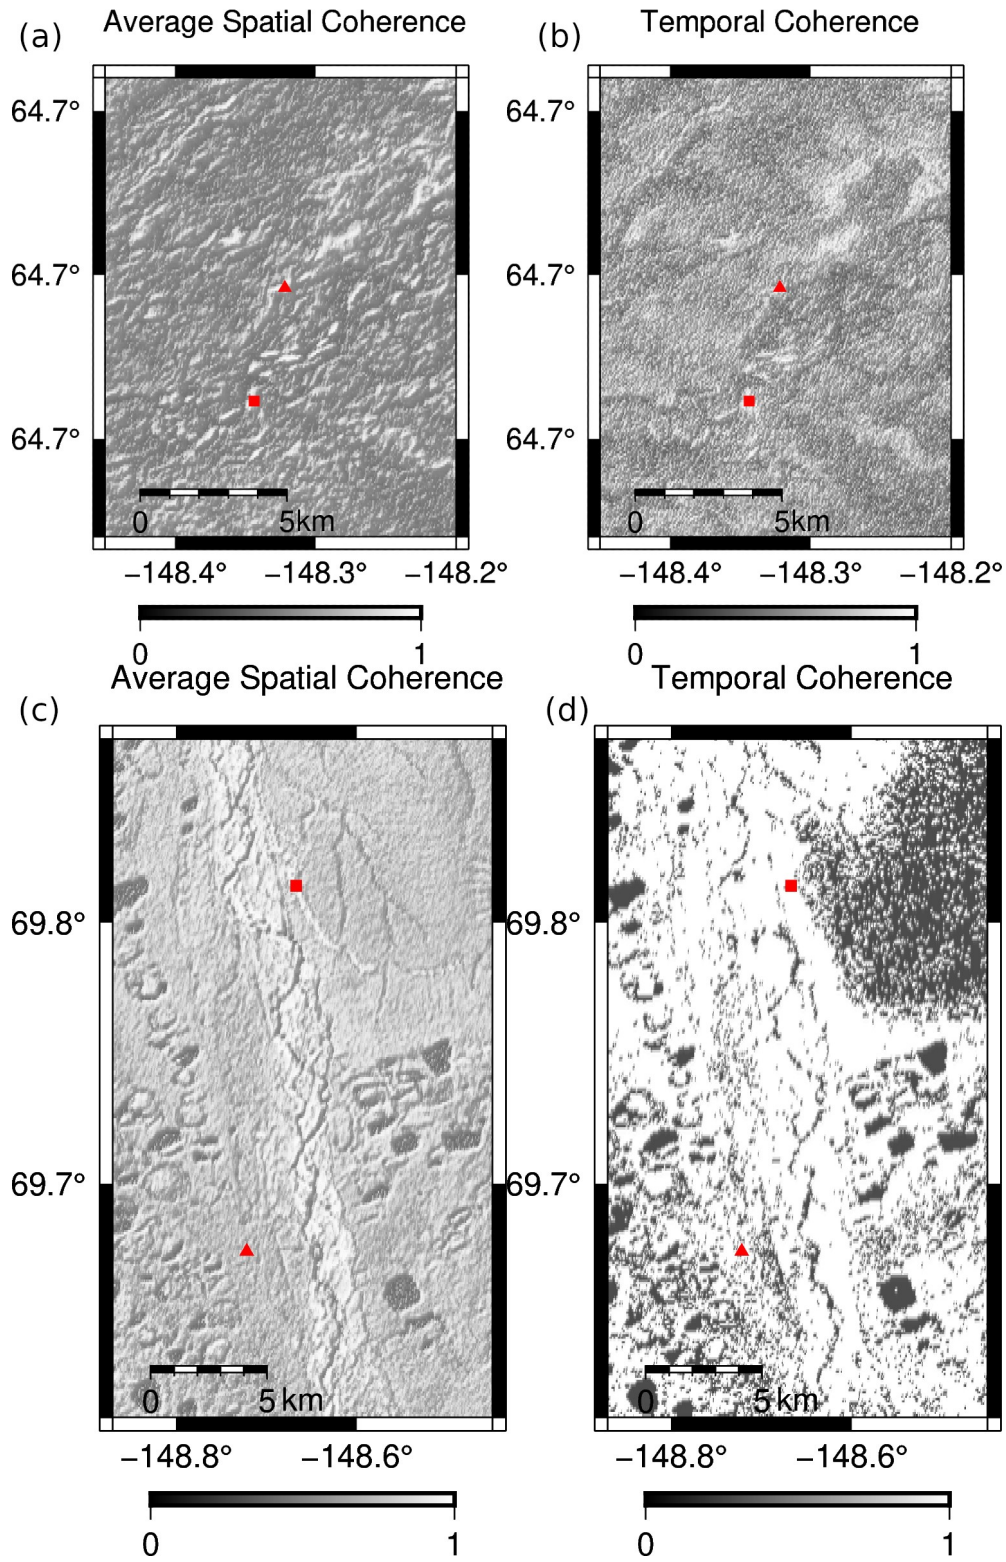

**Figure-S2.** Average spatial (a,c) and temporal (b,d) coherence for two sites: Top, Beta site southwest of Fairbanks, and bottom, CALM site U8. The triangles show the location of sites. The squares show the reference point selected for studies.
